# Supplementary material for: Comparative Genomic Analysis of the Marine Cyanobacterium Acaryochloris marina MBIC10699 Reveals the Impact of Phycobiliprotein Reacquisition and the Diversity of Acaryochloris Plasmids
Source: MDPI journal article supplement (doi:10.3390/microorganisms10071374), 2022-07-07
Supplement: s1 [file s1]

# Comparative genomic analysis of the marine cyanobacterium *Acaryochloris marina* MBIC10699 reveals the impact of phycobiliprotein reacquisition and the diversity of *Acaryochloris* plasmids.

Haruki Yamamoto<sup>1\*</sup>, Kazuma Uesaka<sup>2</sup>, Yuki Tsuzuki<sup>1</sup>, Hisanori Yamakawa<sup>1</sup>, Shigeru Itoh<sup>3</sup>, and Yuichi Fujita<sup>1</sup>

*Supplementary materials*

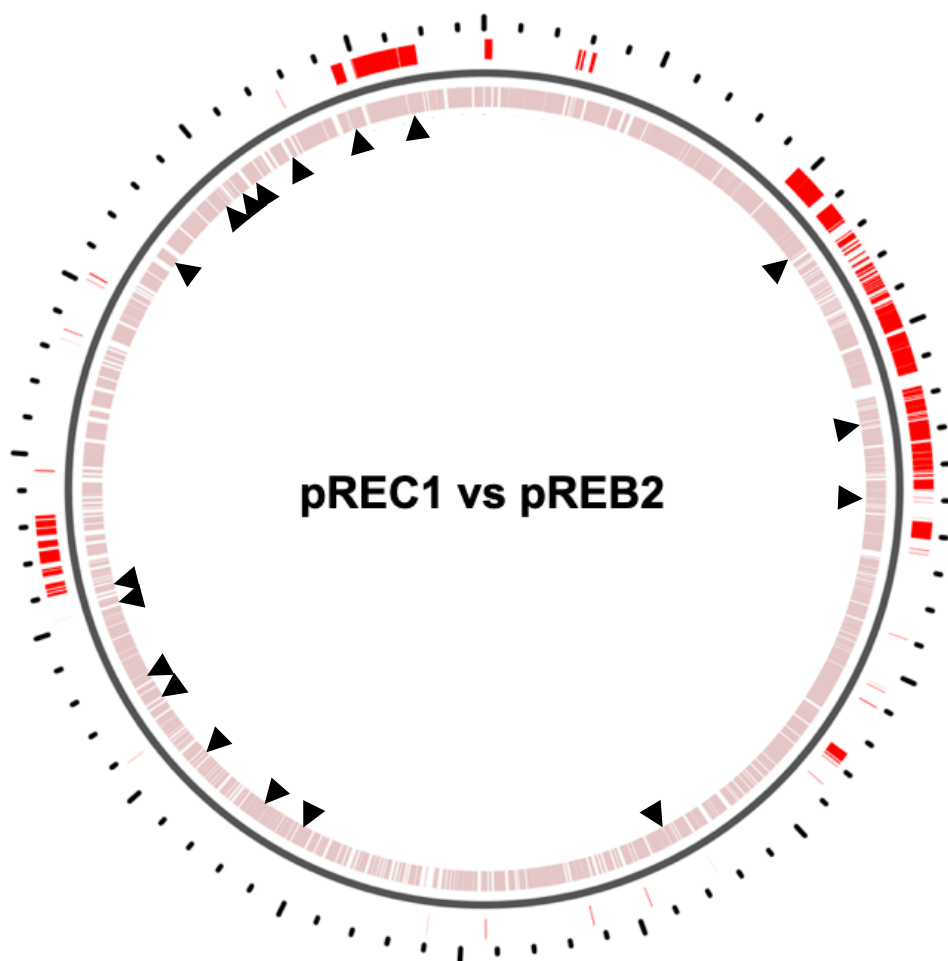

**Figure S1** Loci of pREC1-specific genes in the comparison with pREC1 and pREB2.

Two plasmids with significant homology, pREC1 and pREB2, were compared and genes only present in pREC1 were mapped in red on the pREC1 sequence (light purple). Specific genes were extracted by blastn

(e-value cut off  $1e^{-10}$ , identity cut off 80%). Black triangles show the loci of transposase genes.

**A**

Tree scale: 0.1

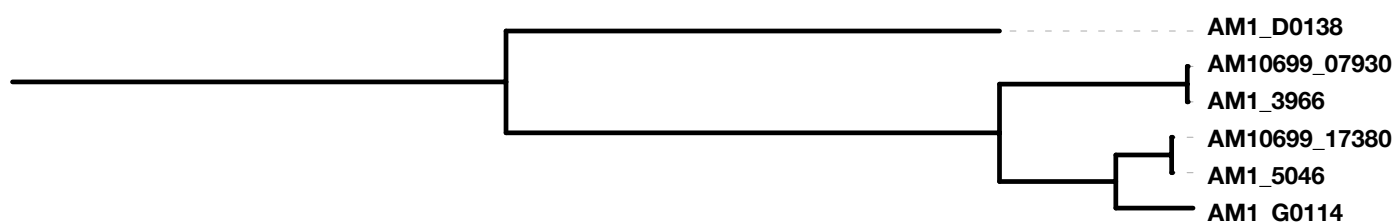

**B**

|               |                                                              |     |
|---------------|--------------------------------------------------------------|-----|
| AM1_D0138     | MKHFRKQLLVGLILTCMGMTFSFQVPVYAGEILEIQPINSVQVSDPQSI--SKESCIPI  | 59  |
| AM10699_07930 | MHSFVRRFGLIGLALATCLSF--WSQPVNALNLQS--GPTIVLADTYRNPIDEKLGTD   | 57  |
| AM1_3966      | MHSFVRRFGLIGLALATCLSF--WSQPVNALNLQS--GPTIVLADTYRNPIDEKLGTD   | 57  |
| AM10699_17380 | MRLFMRRFAVLTLVLASCLGLTG--WLQPANALDIN-----LATTYRNPVDAKLET     | 51  |
| AM1_5046      | MRLFMRRFAVLTLVLASCLGLTG--WLQPANALDIN-----LATTYRNPVDAKLET     | 51  |
| AM1_G0114     | MRLFIRRFALLTLVVASCLSLMG--WLQPVSAIDIQQSNSPGLLAAYRNPVDAKLET    | 59  |
|               | *: * : : : *.: :*: : : : : * . * : : : : * . :               |     |
|               |                                                              |     |
| AM1_D0138     | GEKIDLNANALAFKDCPGYYPTLAKKIINNGPFETVDEVLNIRGLNLKQQLLEDKLD    | 119 |
| AM10699_07930 | GQKIDVNNTNVLAFMKYKGLYPTVAGKVVQNAPYSSVEDVLQIDGLTDQKQKVLQDNM   | 117 |
| AM1_3966      | GQKIDVNNTNVLAFMKYKGLYPTVAGKVVQNAPYSSVEDVLQIDGLTDQKQKVLQDNM   | 117 |
| AM10699_17380 | GQKIDLNNTNVIASFQYKGLYPTIAGKVVQNAPYSSVEEVVLNIDGLTDVQKKMLQQLH  | 111 |
| AM1_5046      | GQKIDLNNTNVIASFQYKGLYPTIAGKVVQNAPYSSVEEVVLNIDGLTDVQKKMLQQLH  | 111 |
| AM1_G0114     | GQKIDLNNTNVIASFQYKGLYPTIAGKVVQNAPYSSVEEVVLNIDGLTEPQKKLLQQHMG | 119 |
|               | *:***:*.:.** . * ***:* *: :*.:.*: :*: ** . ** :*: : : .      |     |
|               |                                                              |     |
| AM1_D0138     | FTVSEPKTDLATRMP---P---RPMMR-                                 | 140 |
| AM10699_07930 | FTISDPDPSLVGGQDRYNPGSYKPFMK-                                 | 144 |
| AM1_3966      | FTISDPDPSLVGGQDRYNPGSYKPFMK-                                 | 144 |
| AM10699_17380 | FTITDPDPALVGGQDRYNPGAYYPVRRS                                 | 139 |
| AM1_5046      | FTITDPDPALVGGQDRYNPGAYYPVRRS                                 | 139 |
| AM1_G0114     | FTVTDPDPALVGGQDRYNTGAYYPVRRS                                 | 147 |
|               | *: : : * . * . : : * . :                                     |     |

**Figure S2** Phylogenic analysis of PsbU paralogs conserved in two *Acaryochloris* strains.

A Phylogenetic tree (A) and an alignment (B) based on amino acid sequences of the two PsbUs conserved in *A. marina* MBIC10699 (AM10699\_07930, 17380) and the four PsbUs conserved in *A. marina* MBIC11017 (AM1\_3966, 5046, D0138, G0114). Plasmid-encoded PsbUs are AM1\_D0138 (pREB4) and AM1\_G0114 (pREB7).

## **Table S1      List of genes for the concatenated protein sequences**

A core gene search was conducted on 26 *Acaryochloris* and *Cyanothece* sp. PCC7425 and *A. thomasi* RCC1774 species, listing 897 genes that are conserved in more than 90% of their strains.

## **Table S2      Chromosome specific gene in *A. marina* MBIC10699**

Genes encoded in the chromosome of *A. marina* MBIC10699 that are not present in the chromosome of *A. marina* MBIC11017 were extracted. Genes in red indicate specific genes that are not present in *A. marina* MBIC11017 at all, while genes in black indicate that they are present in the plasmids of *A. marina* MBIC11017.

## **Table S3      Chromosome specific gene in *A. marina* MBIC11017**

Genes encoded in the chromosome of *A. marina* MBIC11017 that are not present in the chromosome of *A. marina* MBIC10699 were extracted. Genes in blue indicate specific genes that are not present in *A. marina* MBIC10699 at all, while genes in black indicate that they are present in the plasmids of *A. marina* MBIC10699. \* indicates that the same KEGG ID was annotated in multiple genes.

## **Table S4      Plasmids specific gene in *A. marina* MBIC10699**

Genes encoded in the plasmids of *A. marina* MBIC10699 that are not present in the plasmid of *A. marina* MBIC11017 were extracted. Genes in red indicate specific genes that are not present in *A. marina* MBIC11017 at all, while genes in black indicate that they are present in the chromosome of *A. marina* MBIC11017. \* indicates that the same KEGG ID was annotated in multiple genes.

## **Table S5      Plasmids specific gene in *A. marina* MBIC11017**

Genes encoded in the plasmids of *A. marina* MBIC11017 that are not present in the plasmids of *A. marina* MBIC10699 were extracted. Genes in blue indicate specific genes that are not present in *A. marina* MBIC10699 at all, while genes in black indicate that they are present in the chromosome of *A. marina* MBIC10699. \* indicates that the same KEGG ID was annotated in multiple genes.
